# Supplementary material for: Neuroprotective Effects of the Nutraceutical Dehydrozingerone and Its C2-Symmetric Dimer in a Drosophila Model of Parkinson’s Disease
Source: MDPI journal article supplement (doi:10.3390/biom14030273), 2024-02-24
Supplement: s1 [file s1]

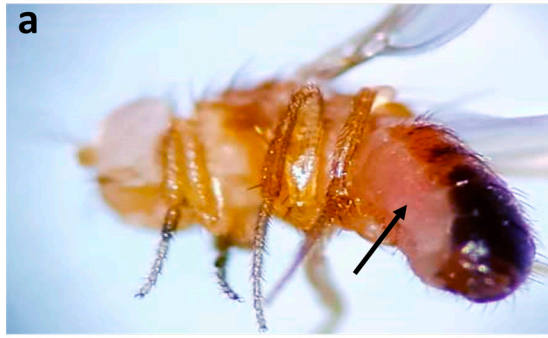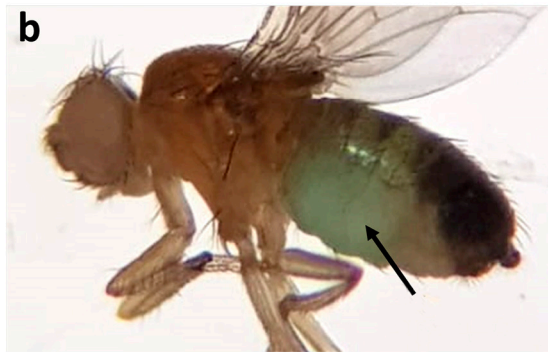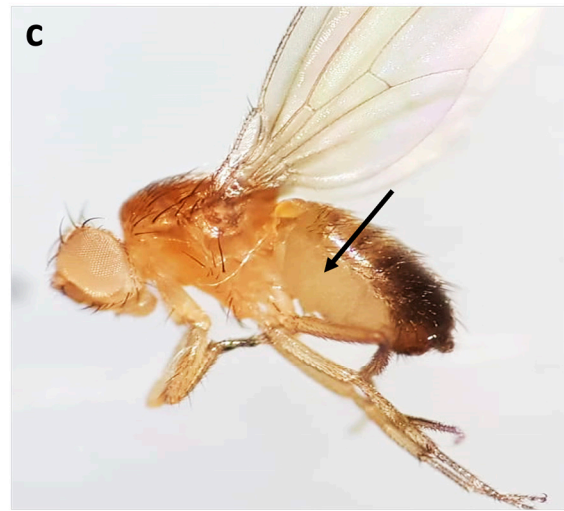

**Figure S1.** Arrows indicate a) red abdomen (DHZ) and b) blue abdomen (DHZ-DIM) of LRRK *Drosophila* reared on medium food dye compared with a LRRK on standard food (c).
